# Supplementary material for: Dynamical modes of two almost identical chemical oscillators connected via both pulsatile and diffusive coupling
Source: Royal Society of Chemistry journal article supplement (doi:10.1039/c7cp08032h), 2018-01-01
Supplement: c7cp08032h1.pdf [file c7cp08032h1.pdf]

## Dynamical modes of two almost identical chemical oscillators connected via both pulsatile and diffusive coupling

*Dmitry A. Safonov and Vladimir K. Vanag*

Centre for Nonlinear Chemistry, Immanuel Kant Baltic Federal University, 14 A.  
Nevskogo str., Kaliningrad, 236041, Russia

### Electronic Supplementary Information

#### Equations

$$dx_i/dt = -k_1x_iy_i + k_2y_i - 2k_3x_i^2 + k_4x_i(c_0 - z_i)/(c_0 - z_i + c_{\min}) - k_0x_i \equiv X(x_i, y_i, z_i)$$

$$dy_i/dt = -3k_1x_iy_i - 2k_2y_i - k_3x_i^2 + k_7u_i + k_9v_iz_i - k_0y_i \equiv Y(x_i, y_i, z_i, u_i, v_i)$$

$$dz_i/dt = 2k_4x_i(c_0 - z_i)/(c_0 - z_i + c_{\min}) - k_9v_iz_i - k_{10}z_i \equiv Z(x_i, z_i, v_i)$$

$$du_i/dt = 2k_1x_iy_i + k_2y_i + k_3x_i^2 - k_7u_i - k_0u_i \equiv U(x_i, y_i, u_i)$$

$$dv_i/dt = k_7u_i - k_9v_iz_i - k_{13}v_i - k_0v_i \equiv V(z_i, u_i, v_i)$$

(A):

$$dx_1/dt = X(x_1, y_1, z_1) \tag{A1}$$

$$dy_1/dt = Y(x_1, y_1, z_1, u_1, v_1) + C_{\text{inh}} \times P(x_2, \Delta t, \tau), \tag{A2}$$

$$dz_1/dt = Z(x_1, z_1, v_1) \tag{A3}$$

$$du_1/dt = U(x_1, y_1, u_1) + k_u(u_2 - u_1), \tag{A4}$$

$$dv_1/dt = V(z_1, u_1, v_1) \tag{A5}$$

$$dx_2/dt = X(x_2, y_2, z_2) \tag{A6}$$

$$dy_2/dt = Y(x_2, y_2, z_2, u_2, v_2) + C_{\text{inh}} \times P(x_1, \Delta t, \tau), \tag{A7}$$

$$dz_2/dt = Z(x_2, z_2, v_2) \tag{A8}$$

$$du_2/dt = U(x_2, y_2, u_2) + k_u(u_1 - u_2). \tag{A9}$$

$$dv_2/dt = V(z_2, u_2, v_2) \tag{A10}$$

$$(B): \quad dx_1/dt = X(x_1, y_1, z_1) + k_x(x_2 - x_1), \quad (B1)$$

$$dy_1/dt = Y(x_1, y_1, z_1, u_1, v_1) + C_{inh} \times P(x_2, \Delta t, \tau), \quad (B2)$$

$$dz_1/dt = Z(x_1, z_1, v_1) \quad (B3)$$

$$du_1/dt = U(x_1, y_1, u_1) \quad (B4)$$

$$dv_1/dt = V(z_1, u_1, v_1) \quad (B5)$$

$$dx_2/dt = X(x_2, y_2, z_2) + k_x(x_1 - x_2), \quad (B6)$$

$$dy_2/dt = Y(x_2, y_2, z_2, u_2, v_2) + C_{inh} \times P(x_1, \Delta t, \tau), \quad (B7)$$

$$dz_2/dt = Z(x_2, z_2, v_2) \quad (B8)$$

$$du_2/dt = U(x_2, y_2, u_2) \quad (B9)$$

$$dv_2/dt = V(z_2, u_2, v_2) \quad (B10)$$

$$(C): \quad dx_1/dt = X(x_1, y_1, z_1) \quad (C1)$$

$$dy_1/dt = Y(x_1, y_1, z_1, u_1, v_1) - k_{diff}[Ag_1]y_1 \quad (C2)$$

$$dz_1/dt = Z(x_1, z_1, v_1) \quad (C3)$$

$$du_1/dt = U(x_1, y_1, u_1) + k_u(u_2 - u_1), \quad (C4)$$

$$dv_1/dt = V(z_1, u_1, v_1) \quad (C5)$$

$$d[Ag_1]/dt = C_{ex} \times P(x_2, \Delta t, \tau) - k_{diff}[Ag_1]y_1 \quad (C6)$$

$$dx_2/dt = X(x_2, y_2, z_2) \quad (C7)$$

$$dy_2/dt = Y(x_2, y_2, z_2, u_2, v_2) - k_{diff}[Ag_2]y_2 \quad (C8)$$

$$dz_2/dt = Z(x_2, z_2, v_2) \quad (C9)$$

$$du_2/dt = U(x_2, y_2, u_2) + k_u(u_1 - u_2). \quad (C10)$$

$$dv_2/dt = V(z_2, u_2, v_2) \quad (C11)$$

$$d[Ag_2]/dt = C_{ex} \times P(x_1, \Delta t, \tau) - k_{diff}[Ag_2]y_2 \quad (C12)$$

(D):

$$dx_1/dt = X(x_1, y_1, z_1) + k_x(x_2 - x_1), \quad (D1)$$

$$dy_1/dt = Y(x_1, y_1, z_1, u_1, v_1) - k_{\text{diff}}[\text{Ag}_1]y_1 \quad (D2)$$

$$dz_1/dt = Z(x_1, z_1, v_1) \quad (D3)$$

$$du_1/dt = U(x_1, y_1, u_1) \quad (D4)$$

$$dv_1/dt = V(z_1, u_1, v_1) \quad (D5)$$

$$d[\text{Ag}_1]/dt = C_{\text{ex}} \times P(x_2, \Delta t, \tau) - k_{\text{diff}}[\text{Ag}_1]y_1 \quad (D6)$$

$$dx_2/dt = X(x_2, y_2, z_2) + k_x(x_1 - x_2), \quad (D7)$$

$$dy_2/dt = Y(x_2, y_2, z_2, u_2, v_2) - k_{\text{diff}}[\text{Ag}_2]y_2 \quad (D8)$$

$$dz_2/dt = Z(x_2, z_2, v_2) \quad (D9)$$

$$du_2/dt = U(x_2, y_2, u_2) \quad (D10)$$

$$dv_2/dt = V(z_2, u_2, v_2) \quad (D11)$$

$$d[\text{Ag}_2]/dt = C_{\text{ex}} \times P(x_1, \Delta t, \tau) - k_{\text{diff}}[\text{Ag}_2]y_2 \quad (D12)$$

Pure diffusive coupling (PDC) (equations used for simulating results shown in Fig. 1)

(PDC):

$$dx_1/dt = X(x_1, y_1, z_1) + k_x(x_2 - x_1) \quad (\text{PDC } 1)$$

$$dy_1/dt = Y(x_1, y_1, z_1, u_1, v_1), \quad (\text{PDC } 2)$$

$$dz_1/dt = Z(x_1, z_1, v_1) \quad (\text{PDC } 3)$$

$$du_1/dt = U(x_1, y_1, u_1) + k_u(u_2 - u_1), \quad (\text{PDC } 4)$$

$$dv_1/dt = V(z_1, u_1, v_1) \quad (\text{PDC } 5)$$

$$dx_2/dt = X(x_2, y_2, z_2) + k_x(x_1 - x_2) \quad (\text{PDC } 6)$$

$$dy_2/dt = Y(x_2, y_2, z_2, u_2, v_2), \quad (\text{PDC } 7)$$

$$dz_2/dt = Z(x_2, z_2, v_2) \quad (\text{PDC } 8)$$

$$du_2/dt = U(x_2, y_2, u_2) + k_u(u_1 - u_2). \quad (\text{PDC 9})$$

$$dv_2/dt = V(z_2, u_2, v_2) \quad (\text{PDC 10})$$

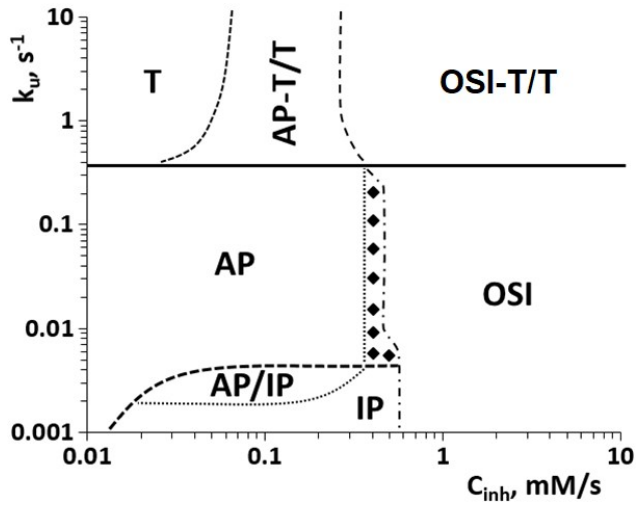

**Figure S1.** The diagram for dynamical modes at mutual inhibitory diffusive and inhibitory pulsatile (IDIP) coupling of two BZ oscillators in the plane  $C_{\text{inh}}-k_u$  at  $\tau = 200$  s and  $h_2 = 0.051$  M. Black rhombs mark the C mode. Solid horizontal line marks the border of the area of the T and T-induced modes like AP-T and OS-T.

Comments to [Fig. S1](#).

- (i) There is a region of birhythmicity between the AP and IP modes.
- (ii) Complex (C) mode emerges in a narrow area (marked by black rhombs) at middle values of  $k_u$ . No C mode is found at small (or zero)  $k_u$ .
- (iii) New AP-T and OSI-T modes emerge at  $k_u > 0.4$  s<sup>-1</sup>, when Turing (T) mode becomes stable at small  $C_{\text{inh}}$ .
- (iv) New AP-T and OSI-T modes coexist with the T mode.

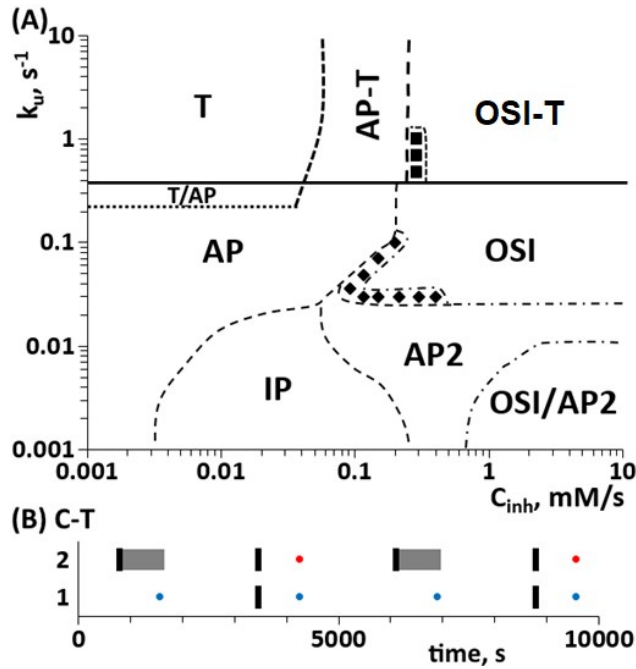

**Figure S2.** (A) The diagram for dynamical modes at mutual inhibitory diffusive and inhibitory pulsatile (IDIP) coupling of two BZ oscillators in the plane  $C_{inh}-k_u$  at  $\tau = 800$  s and  $h_2 = 0.051$  M. Symbols: black rhombs, the C mode; black squares, the C-T mode. Solid horizontal line marks the bottom border of the area of the T and T-induced modes like AP-T and OSI-T. (B) Example of the C-T mode at  $C_{inh} = 0.3$  mM/s and  $k_u = 1$  s<sup>-1</sup>;  $T = 5331$  s.

Comments to [Fig. S2](#).

- (i) Areas of new AP2, C-T, AP-T, OSI-T, and C modes are seen in [Fig. S2\(A\)](#).
- (ii) The C-T mode shown in [Fig. S2\(B\)](#) has the characteristic features of both the C and AP-T (or OSI-T) modes. The area of stable C-T mode is quite narrow. Most likely this area can be made broader by increasing the frequency dispersion.
- (iii) The OSI area (which is a continuous area in [Fig. S1](#)) is split by the insert area of the AP2 mode.
- (iv) New AP-T and OSI-T modes do not coexist with the T mode (like in [Fig. S1](#)), but there are two areas of birhythmicity: T/AP and OSI/AP2.

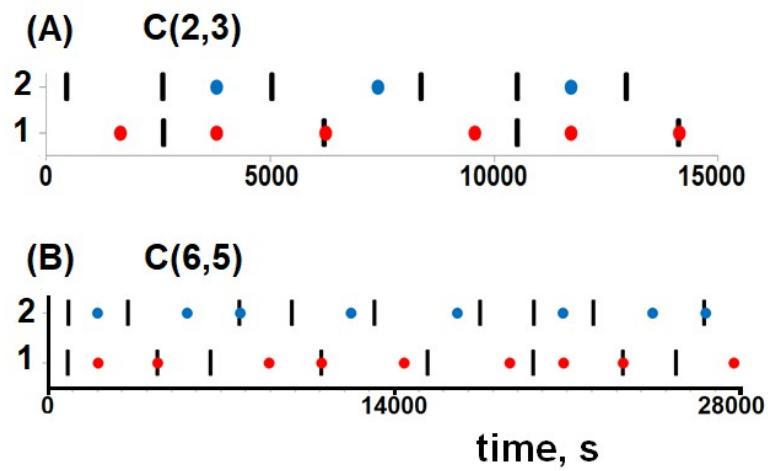

**Figure S3.** Complex modes for mutual inhibitory diffuse and inhibitory pulsatile (IDIP) coupling in the IP region at  $\tau = 1200$  s,  $C_{\text{inh}} = 0.02$  mM/s, and  $h_2 = 0.051$  M. (A) The C(2,3) mode at  $k_u = 0.08$  s $^{-1}$ ;  $T = 7910$  s. (B) The C(6,5) mode at  $k_u = 0.09$  s $^{-1}$ ;  $T = 18825$  s.
